# Supplementary material for: Self-healing in dielectric capacitors: a universal method to computationally rate newly introduced energy storage designs
Source: Royal Society of Chemistry journal article supplement (doi:10.1039/d4cp03988b), 2024-01-01
Supplement: d4cp03988b1.pdf [file d4cp03988b1.pdf]

# **SUPPLEMENTARY INFORMATION**

**for**

## **Self-Healing in Dielectric Capacitors: a Universal Method to Computationally Rate Newly Introduced Energy Storage Designs**

Nadezhda A. Andreeva<sup>1</sup> and Vitaly V. Chaban<sup>2</sup>

(1) Peter the Great St. Petersburg Polytechnic University, Saint Petersburg, Russia.

(2) Yerevan State University, Yerevan, 0025, Armenia. E-mail: [vvchaban@gmail.com](mailto:vvchaban@gmail.com)

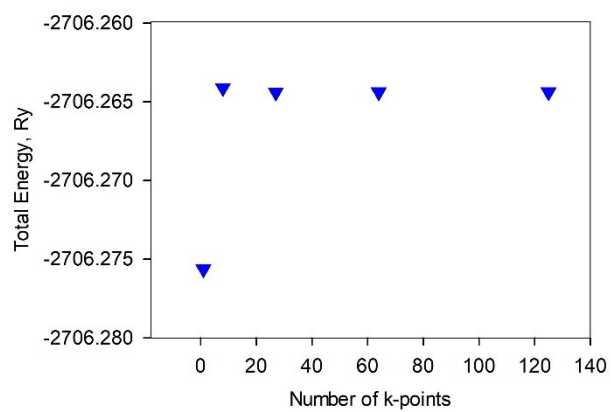

Figure S1. The total energy as of the system a function of the total number of k-points sampled. The PP + 4 Zn system was used to perform the depicted benchmark.

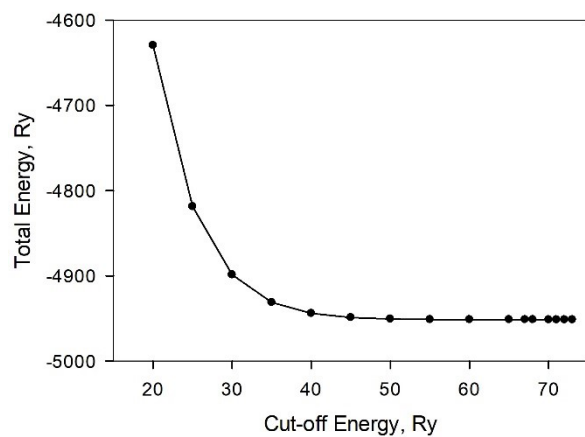

Figure S2. The total energy of the system as a function of the chosen plane-wave cut-off energy. The PP + 4 Zn system was used to perform the depicted benchmark.

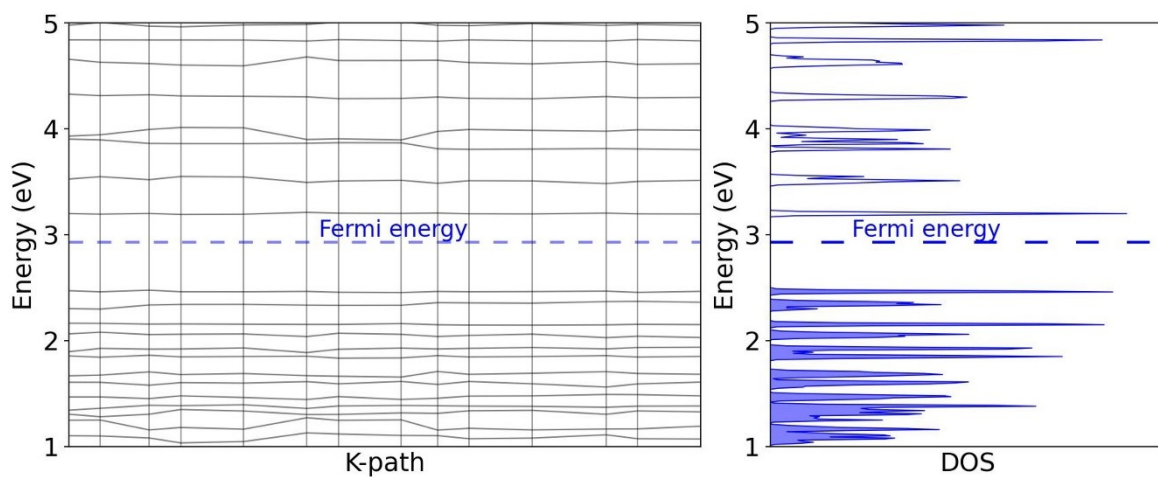

Figure S3. The band structure (left) and DOS (right) of the [4 Zn + PET] system. The band gap amounts to 0.7 eV. The Fermi energy equals 2.9 eV.

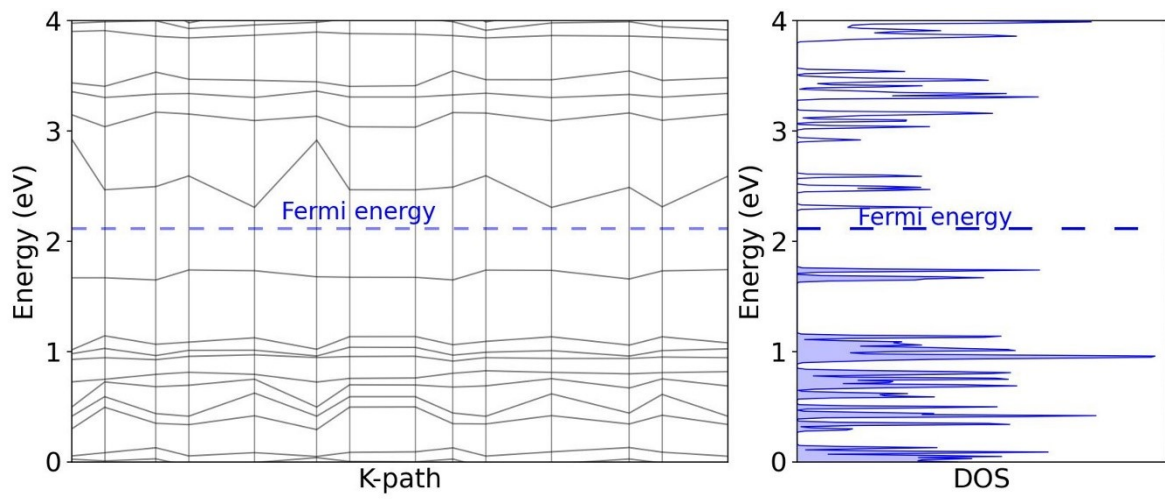

Figure S4. The band structure (left) and DOS (right) of the [4 Zn + PC] system. The band gap is 0.6 eV. The Fermi energy is 2.2 eV.

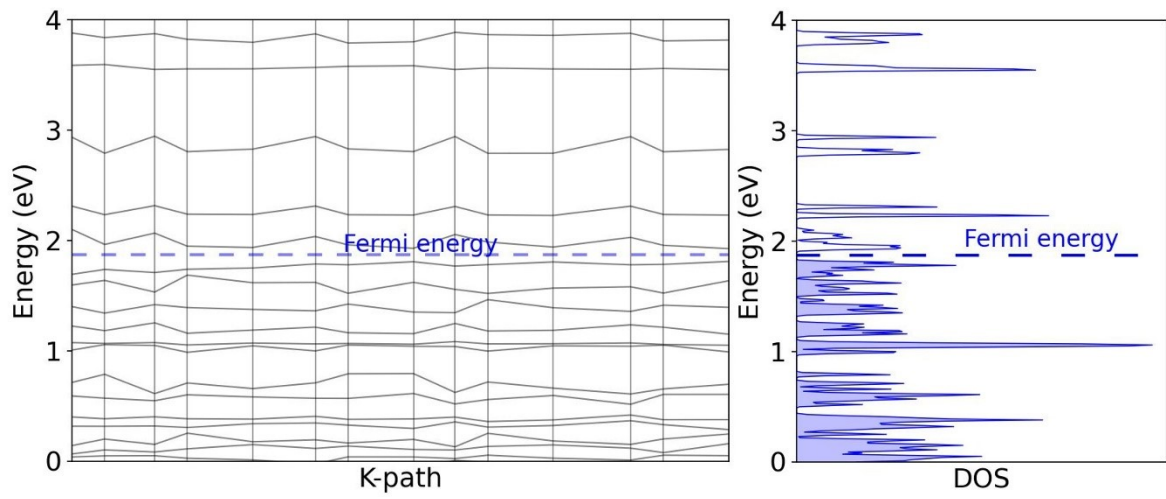

Figure S5. The band structure (left) and DOS (right) of the [4 Zn + Kapton] system. The band gap amounts to 0.12 eV. The Fermi energy is 1.9 eV.
